1 Rare variants imputation in admixed populations:  
2 Comparison across reference panels and bioinformatics tools.

3  
4 Sanjeev Sariya<sup>a,b</sup>, Joseph Lee<sup>a,b</sup>, Richard Mayeux<sup>a,b,c</sup>, Badri N. Vardarajan<sup>a,b</sup>, Dolly Reyes-  
5 Dumeyer<sup>a,b</sup>, Jennifer Manly, Adam Brickman, Rafael Lantigua<sup>d</sup>, Martin Medrano<sup>e</sup>, Ivonne Z.  
6 Jimenez-Velazquez<sup>f</sup> and Giuseppe Tosto<sup>a,b,c</sup>

- 7  
8 a. Taub Institute for Research on Alzheimer's Disease and the Aging Brain, College of  
9 Physicians and Surgeons, Columbia University. 630 West 168<sup>th</sup> Street, New York, NY  
10 10032.  
11 b. The Gertrude H. Sergievsky Center, College of Physicians and Surgeons, Columbia  
12 University. 630 West 168<sup>th</sup> Street, New York, NY 10032.  
13 c. Department of Neurology, College of Physicians and Surgeons, Columbia University and  
14 the New York Presbyterian Hospital. 710 West 168<sup>th</sup> Street, New York, NY 10032  
15 d. Medicine College of Physicians and Surgeons, and The Department of 6Epidemiology,  
16 School of Public Health, Columbia University, New York, NY, USA  
17 e. School of Medicine, Pontificia Universidad Catolica Madre y Maestra, Santiago,  
18 Dominican Republic  
19 f. Department of Medicine, Geriatrics Program, School of Medicine, University of Puerto  
20 Rico, San Juan, Puerto Rico

21  
22  
23  
24  
25  
26  
27  
28  
29  
30  
31  
32  
33  
34  
35  
36  
37

Word counts: Abstract 344; Main Text 3,821; Tables: 4; Figures: 2; References: 35

Correspondence:  
Giuseppe Tosto MD PhD  
Taub Institute for Research on  
Alzheimer's Disease and the Aging Brain  
630 West 168<sup>th</sup> Street  
New York, NY 10032  
Tel: +1 212 305 9274  
Email: [gt2260@cumc.columbia.edu](mailto:gt2260@cumc.columbia.edu)

38 **Abstract.**

39 **Background:** Imputation has become a standard approach in genome-wide association studies  
40 (GWAS) to infer *in silico* untyped markers. Although feasibility for common variants imputation  
41 is well established, we aimed to assess rare and ultra-rare variants' imputation in an admixed  
42 Caribbean Hispanic population (CH).

43

44 **Methods:** We evaluated imputation accuracy in CH (N=1,000), focusing on rare ( $0.1\% \leq$  minor  
45 allele frequency (MAF)  $\leq 1\%$ ) and ultra-rare (MAF  $< 0.1\%$ ) variants. We used two reference  
46 panels, the Haplotype Reference Consortium (HRC; N=27,165) and 1000 Genome Project  
47 (1000G phase 3; N=2,504) and multiple phasing (SHAPEIT, Eagle2) and imputation algorithms  
48 (IMPUTE2, MACH-Admix). To assess imputation quality, we reported: a) high-quality variant  
49 counts according to imputation tools' internal indexes (e.g. IMPUTE2 "Info" $\geq 80\%$ ). b)  
50 Wilcoxon Signed-Rank Test comparing imputation quality for genotyped variants that were  
51 masked and imputed; c) Cohen's kappa coefficient to test agreement between imputed and  
52 whole-exome sequencing (WES) variants; d) imputation of G206A mutation in the *PSEN1*  
53 (ultra-rare in the general population and more frequent in CH) followed by confirmation  
54 genotyping. We also tested ancestry proportion (European, African and Native American)  
55 against WES-imputation mismatches in a Poisson regression fashion.

56

57 **Results:** SHAPEIT2 retrieved higher percentage of imputed high-quality variants than Eagle2  
58 (rare: 51.02% vs. 48.60%; ultra-rare 0.66% vs 0.65%, Wilcoxon p-value  $< 0.001$ ). SHAPEIT-  
59 IMPUTE2 employing HRC outperformed 1000G (64.50% vs. 59.17%; 1.69% vs 0.75% for high-  
60 quality rare and ultra-rare variants, respectively; Wilcoxon p-value  $< 0.001$ ). SHAPEIT-  
61 IMPUTE2 outperformed MaCH-Admix. Compared to 1000G, HRC-imputation retrieved a

62 higher number of high-quality rare and ultra-rare variants, despite showing lower agreement  
63 between imputed and WES variants (e.g. rare: 98.86% for HRC vs. 99.02% for 1000G). High  
64 Kappa ( $K = 0.99$ ) was observed for both reference panels. Twelve G206A mutation carriers were  
65 imputed and all validated by confirmation genotyping. African ancestry was associated with  
66 higher imputation errors for uncommon and rare variants (p-value < 1e-05).

67  
68 **Conclusion:** Reference panels with larger numbers of haplotypes can improve imputation quality  
69 for rare and ultra-rare variants in admixed populations such as CH. Ethnic composition is an  
70 important predictor of imputation accuracy, with higher African ancestry associated with poorer  
71 imputation accuracy.

72

73

74 **Keywords:** Rare variants, Imputation, Admixed population, GWAS, 1000G

## 75 **Introduction**

76 Genome-wide association studies (GWASs) are a major tool to identify common variants  
77 associated with complex diseases. GWAS can include 550K to over 2M Single Nucleotide  
78 Polymorphisms (SNPs) (Ha et al., 2014) to cover the human genome evenly. Although GWAS  
79 has shown to be a robust method to identify disease loci of interest, they rarely point to a causal  
80 coding variant. In fact, microarray SNP chips for GWAS are optimally designed to uncover  
81 common variants, often associated with small effect sizes mostly located in intronic and  
82 intergenic regions. The focus of genetic investigations has since shifted toward rarer alleles with  
83 larger effect sizes (Gibson, 2012). With the changing paradigm, imputation of rare variants has  
84 become an important topic to enhance the genome coverage in GWAS. Imputation is a process  
85 of inferring untyped SNP markers in the discovery population by using densely typed SNPs in  
86 external reference panel(s). These '*in silico*' markers increase the coverage of association tests  
87 while conducting genome-wide association analysis. In addition, large number of SNPs facilitate  
88 meta-analysis when merging data from different study cohorts.

89 The quality of imputation essentially depends on two parameters: available reference datasets  
90 and algorithms that employ those reference datasets. Previous studies have shown that  
91 imputation quality depends on how well reference panels reflect the study population. To  
92 respond to the needs, the 1000 Genome project (1000G), now in its third phase release, has  
93 proven to be one of the most frequently used reference panels (Genomes Project et al., 2015).  
94 Using these composite reference panels, a number of studies (Pei et al., 2010; Howie et al., 2012;  
95 Verma et al., 2014; Liu et al., 2015) have compared imputation accuracy using different  
96 imputation tools and algorithms, although the results are equivocal. Few studies (Browning and  
97 Browning, 2009; Zheng et al., 2012; Zheng et al., 2015) assessed the impact of reference panel

98 size and input data's features - such as density of SNPs - to impute rare variants, suggesting  
99 larger size of reference panels work better. Surakka and colleagues (Surakka et al., 2016)  
100 assessed accuracy of imputed SNPs by evaluating rate of false polymorphisms in a Finnish  
101 population using global reference panels – Haplotype Reference Consortium (HRC) release 1,  
102 1000G phase 1 and a local reference panel. They concluded that higher false positive rate was  
103 observed in imputation from global reference panels compared to imputation performed using a  
104 local panel. Other studies (Huang et al., 2015; Das et al., 2016) found imputation accuracy  
105 increases with higher number of haplotypes, specifically for variants with  $MAF \leq 0.5\%$ . For  
106 Hispanic populations, Nelson and colleagues (Nelson et al., 2016) compared imputation  
107 performances with 1000G phase 1 (N=1,092) vs. 1000G phase 3 (N=2,504), concluding that  
108 phase 3 improved accuracy for variants with  $MAF < 1\%$  by . Further, Nagy and colleagues (Nagy  
109 et al., 2017) showed that HRC reference panel provides new insight for novel variants  
110 particularly for rare variants in a family-based Scottish study cohort. Aforementioned studies  
111 highlighted the need of a larger sized reference panel to improve imputation quality. Herzig and  
112 colleagues (Herzig et al., 2018) assessed tools for haplotype phasing and their impact on  
113 imputation in a population isolate of Campora in southern Italy, and showed that SHAPEIT2,  
114 SHAPEIT3 and EAGLE2 were highly accurate in phasing; MINIMAC3, IMPUTE4 and  
115 IMPUTE2 were found to be reliable for imputation. Roshyara and colleagues (Roshyara et al.,  
116 2014) compared MaCH-Admix, IMPUTE2, MACH, MACH-Minimac in different ethnicities by  
117 evaluating accuracy of correctly imputed SNPs; MaCH-Minimac outperformed SHAPEIT-  
118 IMPUTE2 in subsamples of different ethnic groups. These studies demonstrated how employed  
119 imputation algorithm determines quality of inferred SNPs.

120

121 However, no study to our knowledge has evaluated reference panels in tandem with different  
122 imputation algorithms to assess imputation quality of inferred SNPs based on MAF in a three-  
123 way admixed population. Based on these findings, we assessed imputation quality, focusing on  
124 rare and ultra-rare variants, in a large dataset of Caribbean Hispanics (CH) leveraging available  
125 GWAS and sequencing data available for our cohort.

126

127

128

## 129 **Methods**

130 We will refer SNPs with MAF between 1-5% as “uncommon,” 0.1-1% as “rare,” and  $\leq 0.1\%$  as  
131 “ultra-rare”. We considered SNPs with IMPUTE-Info metric  $\geq 0.40$  as “good-quality” and  $\geq 0.80$   
132 as “high-quality”.

133  
134 GWAS samples and genotyping. We selected randomly 1,000 Caribbean Hispanics as part of an  
135 original genotyped cohort of 3,138 individuals: **genotyped data can be downloaded at dbGaP**  
136 **Study Accession: phs000496.v1.p1.** 719 individuals were derived from Estudio Familiar  
137 Investigar Genetica de Alzheimer (EFIGA), a study of familial LOAD; and 281 individuals from  
138 the multiethnic longitudinal cohort, Washington Heights, Inwood, Columbia Aging Project  
139 (WHICAP). The information on study design, recruitment and GWAS methods for the EFIGA  
140 and WHICAP study was previously described in Tosto, G., et al (Tosto et al., 2015).

141  
142 GWAS quality control (QC). Genotyped data underwent quality control using PLINK (v1.90b4.9  
143 64-bit) (Purcell et al., 2007). Briefly, we excluded SNPs with missing rate  $\geq 5\%$  followed by  
144 exclusion of SNPs with MAF  $\leq 1\%$ . We then removed SNPs with P-value  $< 1e-6$  for Hardy-  
145 Weinberg Equilibrium. Samples with missing call rate  $\geq 5\%$  were excluded from analysis.

146  
147 Global Ancestry estimation and selection of “true Hispanics”. Prior to imputation, we estimated  
148 global ancestry using the ADMIXTURE (v.1.3.0) software (Alexander et al., 2009; Zhou et al.,  
149 2011). We conducted supervised admixture analyses using three reference populations: African  
150 Yoruba (YRI) and non-Hispanic white of European Ancestry (CEU) from the HAPMAP project  
151 as representative of African and European ancestral populations; and eight Surui, 21 Maya, 14  
152 Karitiana, 14 Pima and seven Colombian individuals from the Human Genome Diversity Project

153 (HGDP) were used to represent native American ancestry (Li et al., 2008). We used ~80,000  
154 autosomal SNPs that were: I) genotyped in all three datasets (Caribbean Hispanics, 1000G and  
155 HGDP); II) common (i.e. MAF >5 %); and III) in linkage equilibrium. Supervised admixture  
156 analyses with the three reference populations (YRI, CEU, and Native Americans) revealed that  
157 European lineage accounted for most of the ancestral origins (59%), followed by African (33%)  
158 and native American ancestry (8%). We then selected only individuals with at least 1% of all  
159 three ancestral populations.

160  
161 *Reference panels.* HRC reference panel contained over 39M SNPs from 27,165 individuals who  
162 participated in 17 different studies (**Table 1**). The data were downloaded from the Wellcome  
163 Trust Sanger Institute (WTSI).

164 1000G phase 3 reference panel contained over 81M SNPs from 2,504 individuals  
165 ([https://mathgen.stats.ox.ac.uk/impute/1000GP\\_Phase3.tgz](https://mathgen.stats.ox.ac.uk/impute/1000GP_Phase3.tgz)). It includes 26 ethnic groups, with  
166 most variants rare, approximately 64 million had MAF <0.5%; approximately 12 million had a  
167 MAF between 0.5% and 5%; and approximately 8 million have MAF >5%. In order to perform  
168 imputation with MaCH-Admix, 1000G Phase 3 pre-formatted data were downloaded from  
169 [ftp://yunlianon:anon@rc-ns-](ftp://yunlianon:anon@rc-ns-ftp.its.unc.edu/ALL.phase3_v5.shapeit2_mvncall_integrated.noSingleton.tgz)  
170 [ftp.its.unc.edu/ALL.phase3\\_v5.shapeit2\\_mvncall\\_integrated.noSingleton.tgz](ftp.its.unc.edu/ALL.phase3_v5.shapeit2_mvncall_integrated.noSingleton.tgz) that contained over  
171 47M SNPs.

172 The subsequent analyses were restricted to autosomal chromosomes, only.

173  
174 *Phasing and Imputation Procedures.* We compared SHAPEIT2 (Delaneau et al., 2013) and Eagle2  
175 (Loh et al., 2016) by phasing and then imputing (see next section) a single chromosome



176 (Chromosome 21), using both reference panels. We refer to SHAPEIT2 as SHAPEIT when used  
177 in tandem with IMPUTE2 for the remainder of paper.  
178  
179 Imputation was carried out using two bioinformatics tools: IMPUTE2 (Howie et al., 2009) and  
180 MaCH-Admix (Liu et al., 2013). For both, imputation quality ranged from 0 to 1, with 0  
181 indicating complete uncertainty in imputed genotypes, and 1 indicating no uncertainty in  
182 imputed genotypes.  
183 IMPUTE2 (version 2.3.2). IMPUTE2 uses an MCMC algorithm to integrate over the space of  
184 possible phase reconstructions for genotypes data. We conducted imputation in non-overlapping  
185 1MB chunk regions; chunk coordinates were specified using the “-int” option. Other options  
186 were used with default parameters (**Supplementary section 1**). Briefly, we used a default  
187 250KB buffer region to avoid quality deterioration on the ends of chunk region. “-Ne” value as  
188 2000 suggested for robust imputation which scales linkage disequilibrium and recombination  
189 error rate. MaCH-Admix. We used MaCH-Admix because it uses a method based on IBS  
190 matching in a piecewise manner. The method breaks genomic region under investigation into  
191 small pieces and finds reference haplotypes that best represent every small piece, for each target  
192 individual separately. MaCH-Admix imputes in three steps: phasing, estimation of model  
193 parameter that includes error rate and recombination rate and lastly, haplotype-based imputation.  
194 MaCH-Admix (version Beta 2.0.185) was run on default parameters of 30 rounds, 100 states (--  
195 autoFlip flag). Details can be found in supplementary file (**section 1**). We initially compared  
196 performance between MaCH-Admix and IMPUTE2 using the 1000G reference panel for  
197 Chromosome 21 only. We then proceeded to impute all remaining chromosomes with the tool  
198 that performed better.

199

200 Imputation Performance Metrics. IMPUTE2 uses “Info” parameter to report imputation quality  
201 that measures relative statistical information about SNP allele frequency from imputed data. It  
202 reflects the information in imputed genotypes relative to the information if only the allele  
203 frequency were known. “Info” metric is used to filter poorly imputed SNPs from IMPUTE2 and  
204 is reported for all imputed SNPs. In addition, IMPUTE2 uses an internal metric known as  $R^2$ ,  
205 reported for genotyped SNPs only: it measures squared correlation between genotyped SNPs and  
206 the same SNPs that have been first masked internally and then imputed. MaCH-Admix uses *Rsq*  
207 to report imputation quality. The  $R^2$  metric is also known as variance ratio, calculated as  
208 proportion of empirically observed variance (based on the imputation) to the expected binomial  
209 variance  $p(1-p)$ , where  $p$  is the minor allele frequency. A threshold of 0.30 is recommended to  
210 filter out poorly imputed SNPs.

211 Despite quality measures from IMPUTE2 and MaCH-Admix being highly correlated (Marchini  
212 and Howie, 2010), we calculated a *r2hat* score to generate a single common metric to assess  
213 imputation quality across the software (Hancock et al., 2012) (v109,  
214 [http://www.unc.edu/~yunmli/tgz/r2\\_hat.v109.tgz](http://www.unc.edu/~yunmli/tgz/r2_hat.v109.tgz)).

215 We compared performance of MaCH-Admix and SHAPEIT-IMPUTE2 by: a) Reporting raw  
216 SNP counts based on quality (MaCH-Admix “Rsq” and IMPUTE2 “Info”); b) Comparing *r2hat*  
217 for overlapping imputed SNPs from both tools; c) Conducting a Wilcoxon Signed-Rank Test (R  
218 v3.4.2) on *r2hat* value of overlapping SNPs.

219

220 We compared performance of Eagle2 and SHAPEIT2 phasing tools in tandem with IMPUTE2 as  
221 imputation tools across reference panels by: a) Comparing their respective IMPUTE2  $R^2$ : b)

222 Conducting a Wilcoxon Signed-Rank Test on  $R^2$  value; c) Reporting raw counts of imputed  
223 SNPs based on IMPUTE2 “Info” metric and stratified by MAF bins (e.g. common, rare, ultra-  
224 rare).

225 In all comparisons, the MAFs are estimated from imputed data according to the reference panel  
226 employed. We retained monomorphic SNPs in our analyses for several reasons. A monomorphic  
227 SNP in one study might not be monomorphic in other cohorts. This has profound affects, for  
228 example, when performing meta-analysis across different studies. In addition, monomorphic  
229 SNPs provide information about MAF across studies. Without the information it is difficult to  
230 tell, for instance, if a SNP is monomorphic or failed quality control in that study.

231  
232 *Agreement between Imputed and Sequence data.* To further test the quality of imputation -  
233 without relying on software’s internal metrics (i.e. “Info” and  $R^2$ ) - we calculated genotyped  
234 concordance between imputed and WES data using the VCF-compare tool (v0.1.14-12-  
235 gcdb80b8) (Danecek et al., 2011). First, we converted posterior probabilities obtained from  
236 imputation into genotype data using the PLINK software (v1.90b4.9) by applying a threshold of  
237 0.9 (**supplementary section 1**), such that SNPs that failed on this criterion were left uncalled.  
238 For example, an imputed SNP with  $P(G=0,1,2) = (0.01, 0.9, 0.09)$  would be called as a '1'  
239 (heterozygous), whereas an imputed SNP with  $P(G=0,1,2) = (0.2, 0.6, 0.2)$  would be left  
240 uncalled. We restricted the comparison to overlapping SNPs between HRC, 1000G reference  
241 panels and whole-exome sequencing (WES) data for Chromosome 14 only, on SNPs with 0%  
242 missingness (plink --missing flag) in WES data. We also assessed variants’ agreement according  
243 to different MAF bins for “high-quality” (“Info”  $\geq 0.8$ ) SNPs. The output resulted in number of  
244 variant “mismatches”, i.e. the count of allele not matching between imputed and sequenced

245 variants per individual. To measure interrater reliability we computed Cohen’s kappa coefficient  
246 (McHugh, 2012) for both the reference panels against WES data. Kappa coefficient  $\leq 0$   
247 indicates no agreement, 0.01–0.20 as none to slight, 0.21–0.40 as fair, 0.41– 0.60 as moderate,  
248 0.61–0.80 as substantial, and 0.81–1.00 as almost perfect agreement.

249

250 Effects of Ancestry on Imputation Quality. To assess how ancestry affected imputation quality,  
251 we conducted a Poisson regression using R. We used percentage of global ancestry (European  
252 (CEU), Native (NAT) and African (YRI) as predictors, and total number of mismatches as the  
253 outcome; analyses were restricted to “high-quality” SNPs, only.

254

255 Imputation of G206A Mutation in PSEN1. To evaluate imputation performance of a specific rare  
256 variant, we examined a founder mutation, p.Gly206Ala (G206A - rs63750082) in the *PSEN1*  
257 gene (PSEN1-G206A) (Athán et al., 2001; Lee et al., 2015). The PSEN1-G206A mutation is a  
258 rare variant observed primarily in Puerto Ricans with familial early onset Alzheimer’s disease  
259 (EOAD), but it is rare in Puerto Ricans and other populations with late-onset Alzheimer’s  
260 disease (LOAD) (Arnold et al., 2013). The mutation was present in the 1000G phase 3 reference  
261 panel with an allele frequency of 0.001, but was absent in the HRC reference panel. To verify  
262 whether individuals who were found to carry the PSEN1-G206A mutation based on 1000G-  
263 imputation, they were genotyped using the KASP genotyping technology by LGC genomics  
264 (<https://www.lgcgroup.com>), which uses allele-specific PCR for SNP calling. Agreement  
265 between imputed and genotype data for the PSEN1-G206A mutation was then assessed. We also  
266 tested the effect on imputation quality based on different IMPUTE2-parameters settings, more  
267 specifically by modifying the chunk size (i.e. 1MB vs. 5 MB).

268 **Results**

269

270 *Comparison of Phasing Tools: Eagle2 vs. SHAPEIT2.* To select the optimal tool for phasing, we  
271 compared SHAPEIT2 with Eagle2 using Chromosome 21 with 13,066 genotyped SNPs by  
272 performing subsequent imputation with IMPUTE2 on phased outputs, and using both reference  
273 panels. We found SHAPEIT2 better than Eagle2 when evaluated based on mean  $R^2$  and “Info”  
274 metric using either the reference panels. For instance, using the 1000G, we observed higher  
275 mean  $R^2$  for data phased with SHAPEIT2 as compared to Eagle2 (0.92 vs. 0.91; Wilcoxon p-  
276 value  $< 0.001$ ). Similarly, when HRC panel was employed, mean  $R^2$  of 0.89 was observed for  
277 SHAPEIT2 against 0.85 for Eagle2 (Wilcoxon signed-rank test p-value  $< 0.001$ ).

278 SNP count comparison details can be found in **Supplementary Table 1-2**. Regardless of the  
279 reference panel employed, we observed higher percentage of “high-quality” rare and ultra-rare  
280 SNPs for SHAPEIT-IMPUTE2 than Eagle2-IMPUTE2. For instance, 1000G-imputation  
281 retrieved 51.02% of “high-quality” rare SNPs using SHAPEIT-IMPUTE2 vs. 48.38% with  
282 Eagle2-IMPUTE2. Detailed comparisons for different MAF bins and quality threshold can be  
283 found in **Supplementary Section 2**. Nevertheless, we found Eagle2 faster than SHAPEIT2 when  
284 computation times were compared; for instance, with HRC Eagle2 was ~6 times faster than  
285 SHAPEIT2 (**Supplementary Table 3**). We therefore imputed the remaining chromosomes on  
286 phased output from SHAPEIT2. Comparison of phasing tools by assessing switch error rate was  
287 beyond the scope of this paper due to limited resources, for e.g., availability of phased reference  
288 panel for an admixed population.

289

290 MaCH-Admix vs. IMPUTE2. We found that SHAPEIT-IMPUTE2 performed better than MaCH-  
291 Admix. For Chromosome 21, we imputed 1,104,648 and 646,594 SNPs for SHAPEIT-  
292 IMPUTE2 and MaCH-Admix, respectively; 549,091 SNPs were overlapping. For SHAPEIT-  
293 IMPUTE2 we observed 446,591 bi-allelic SNPs with “Info”  $\geq 0.40$ , in contrast with 598,943  
294 SNPs with  $R_{sq} \geq 0.30$  from MaCH-Admix (**Supplementary Table 4**). SNP counts for different  
295 MAF bins based on platform-specific quality index can be found in **Supplementary Table**  
296 **5**. When the two outputs were compared in terms of  $r^2_{hat}$ , SHAPEIT-IMPUTE2 showed a  
297 higher average  $r^2_{hat}$  of 0.62 against 0.36 from MaCH-Admix (Wilcoxon signed-rank test p-value  
298  $< 0.001$ ). Also, MaCH-Admix was 109 times slower than IMPUTE2. (**Supplementary Table 6**),  
299 thus, comparison between different panels using MaCH-Admix were excluded due to limited  
300 resources. For the remaining of this manuscript, we focused on imputation employing SHAPEIT-  
301 IMPUTE2, only.

302  
303 Comparison between HRC and 1000G using SHAPEIT-IMPUTE2. Using SHAPEIT-IMPUTE2,  
304 we imputed 81,240,392 and 38,532,090 SNPs across all autosomal chromosomes with 1000G  
305 and HRC reference panels, respectively (**Table 2**).

306 Overall, we observed slightly higher mean  $R^2$  with 1000G than with HRC panel (0.94 vs. 0.92;  
307 Wilcoxon p-value  $< 0.001$ ). Nevertheless, when the analyses were restricted to only “good-” and  
308 “high-quality” SNPs, HRC consistently performed better: 60.82% of HRC-imputed SNPs were  
309 “good-quality” and 48.87% were “high-quality” (Wilcoxon signed-rank test p-value  $< 0.001$ ). On  
310 the contrary, 40.32% of 1000G imputed SNPs were “good-quality” and 30.11% were “high-  
311 quality”.

312 Further, we evaluated performance for uncommon, rare and ultra-rare SNPs. For “good-” and  
313 “high-quality” SNPs, HRC outperformed 1000G. For example, HRC panel produced 62.85% of  
314 “high-quality” rare SNPs, whereas 1000G had 53.83% (**Table 3**). When average imputation  
315 “Info” quality was evaluated, HRC-imputation again performed better than with 1000G  
316 (Wilcoxon p-value < 0.001) (**Figure 1**).

317  
318 Next, we restricted our analyses to *overlapping* SNPs across the two reference panels only, based  
319 on their chromosome and position mapping, reference and non-reference alleles. For “good-” and  
320 “high-quality” SNPs, imputation in both panels performed similarly (**Table 2**). When restricted  
321 to uncommon, rare and ultra-rare SNPs, we observed higher percentage of “good-” and “high-  
322 quality” SNPs for HRC panel as compared to 1000G reference panel (**Table 3**). For example,  
323 7.44% of HRC-imputed ultra-rare SNPs were “good-quality” vs. 4.95% with the 1000G. 1.69%  
324 of HRC-imputed ultra-rare SNPs were “high-quality” vs. 0.75% with the 1000G. Further,  
325 Wilcoxon test on “Info” value of “high-quality” ultra-rare SNPs (2,972) again showed better  
326 performances when HRC was employed vs. 1000G (P-value < 0.001). Complete list of counts  
327 and percentages across reference panels, MAF bins and quality score can be found in **Table 3**.  
328

329 *The case of G206A and the effect of chromosomal chunk size on imputation quality.* SNP  
330 rs63750082 is absent from HRC panel therefore no imputation was achieved. Using 1000G  
331 reference panel, 12 individuals were imputed as G206A carriers. SNP rs63750082 was imputed  
332 with an IMPUTE2 “Info” score of 0.48 using 1MB as chromosomal region parameter. When we  
333 increased the chunk size to 5MB, IMPUTE-Info score drastically improved to 0.94 (**Figure 2**).  
334 Those patients labeled as mutation-carriers according to imputation were then genotyped: all 12

335 were confirmed to be G206A carriers, therefore achieving a perfect imputation prediction (100%  
336 agreement) for that specific SNP.

337

338 Genotype Concordance and Kappa Coefficient. Out of the 1,000 individuals included in our  
339 study, 262 had whole exome sequencing (WES) data available (Raghavan et al., 2018). We had  
340 14,157 overlapping SNPs in WES, HRC and 1000G reference panels with 0% missingness in  
341 WES data on Chromosome 14; SNPs imputed with each reference panel were compared against  
342 WES data separately. When concordance was evaluated, HRC panel performed slightly poorer,  
343 despite showing higher number of “high-quality” variants as compared to 1000G (**Table 4**).

344 Using 1000G, we observed 3,542 rare and 35 ultra-rare “high-quality” SNPs; across 262  
345 samples, we counted 1,245  $((1,245/(3,542*262))*100= 0.13\%)$  and 10 (0.10%) mismatches for  
346 rare and ultra-rare respectively. Using HRC, we retrieved 3,759 rare and 93 ultra-rare “high-  
347 quality” variants; we observed 2,439 (0.24%) and 32 (0.13%) mismatches for rare and ultra-rare  
348 variants, respectively. Details about pipeline can be found in **supplementary section 3**.

349 Next, we computed Cohen’s kappa coefficient ( $K$ ) for 14,157 imputed SNPs common in WES  
350 and the two reference panels. For both HRC and 1000G-imputation, we observed Kappa ( $K$ ) of  
351  $\sim 0.99$  for both rare and ultra-rare “high-quality” variants(**Table 4**). Details about pipeline can be  
352 found in **supplementary section 4**.

353

354 Effects of Ancestry on Imputation Quality. We evaluated the effect of individual ancestral  
355 component separately on SNP mismatches for Chromosome 14 on 262 individuals. For both  
356 reference panels we found that higher African ancestry (YRI) was associated with higher number  
357 of mismatches (**Supplementary table 7**). For instance, with 1000G reference panel, for rare  
358 variants (“Info”  $\geq 0.80$ ), we observed an estimate of 1.46 (P-value $<0.001$ ) for YRI component



359 (indicating that for each unit increase in YRI ancestry, it results in 1.46 additional mismatches).  
360 Details on confidence intervals and robust standard errors can be found in **supplementary file**  
361 **(Table 7 and Section 5)**. We did not observe significant effect of ancestry on “high-quality”  
362 ultra-rare variants in both panels.  
363

364 **Discussion**

365 This study examined imputation performances in a cohort Caribbean Hispanics, focusing on  
366 uncommon, rare and ultra-rare variant, by comparing different phasing and imputation tools, as  
367 well as evaluating the effects of different reference panels. Overall, uncommon and rare variants  
368 can be well imputed in this population, characterized by a unique genetic background. Caribbean  
369 Hispanics are admixed with 59% of their genetic component from European, 32% African, and  
370 8% Native American ancestry (Tosto et al., 2015). Due to their genetic makeup and unique  
371 linkage disequilibrium patterns, admixed populations offer unique opportunity in studying  
372 complex diseases. First, disease prevalence varies across ethnic groups (Igartua et al., 2015) and  
373 certain admixed populations show higher incidence rates and prevalence (e.g. Alzheimer's  
374 disease, diabetes etc.) or lower ones (e.g. multiple sclerosis). Second, variants that are ethnic-  
375 specific may explain a higher prevalence of the disease of interest in admixed groups.

376

377 In the present study, we examined multiple parameters of imputation using the Caribbean  
378 Hispanics population. First, we found that imputation using SHAPEIT-IMPUTE2 phasing  
379 generated better results than Eagle2-IMPUTE2, and SHAPEIT-IMPUTE2 is superior to MaCH-  
380 Admix in terms of imputation performances and process time.

381 Using SHAPEIT-IMPUTE2, 1000G SNPs outnumbered HRC panel because of the higher  
382 number of SNPs included in the reference panel itself. However, when we restricted our analyses  
383 to overlapping “good-” and “high-quality” SNPs (i.e. those variants that most likely would be  
384 included in association analyses), HRC-imputation outperformed 1000G with higher. The  
385 superior performance of HRC over 1000G was confirmed also when we focused on uncommon,

386 rare and ultra-rare SNPs only. Our findings confirm data in literature, i.e. reference panels with  
387 higher number haplotypes perform better in different scenarios.

388 Additional investigations are needed in order to apply our findings to other admixed and non-  
389 admixed populations.

390  
391 Overall, higher quality of imputation for rare and ultra-rare variants was also confirmed when we  
392 tested results against sequencing data. Finally, higher YRI global ancestry was found to  
393 significantly impair SNP imputation, suggesting that imputation quality decreases with increased  
394 African ancestry.

395  
396 Lastly, SHAPEIT-IMPUTE2 with 1000G reference panel was successful in identifying G206A  
397 mutation carriers. We also noticed that imputation quality drastically improved when imputation  
398 was conducted using large (5MB) chunk size as compared to small (1MB) chunks. This seems to  
399 contradict previous observation: Zhang et al (Zhang et al., 2011) studied the effect of window  
400 size on imputation in an African-Americans . They concluded that window size of 1MB could be  
401 considered acceptable. Possible explanations for these different results might be the more  
402 complex admixture of CH compare to AA (three-way vs. two-way admixed) and a more  
403 complex LD pattern for the G206A region. Ultimately, we recommend to consider a wider  
404 window size to achieve high-quality imputation in specific variants that fail under default  
405 settings.

406  
407 This work has limitations. First, we could carry out the comparison between the two reference  
408 panels restricting the analyses to overlapping variants only, limiting our observation to a subset

409 of the variants included in the 1000G panel. This is a result of the HRC composition, which is  
410 composed by several studies and ended up including only a consensus number of variants.  
411 Second, we tested the agreement between imputed and sequenced variants in a smaller subset of  
412 individuals that had both GWAS and WES data available.

413 **Acknowledgments**

414 We thank the EFIGA study participants and the EFIGA research and support staff for their  
415 contributions to this study. This study was supported by funding from the National Institute on  
416 Aging [R21AG054832 (GT); 5R37AG015473 and RF1AG015473 (RM); R56 AG051876 and  
417 R01 AG058918 (JL)] and the BrightFocus Foundation (A2015633S (JL)).

418

419

420 **Conflict of Interest Statement**

421 The authors declare no conflict of interests.

422

## 423 **References.**

- 424 Alexander, D.H., Novembre, J., and Lange, K. (2009). Fast model-based estimation of ancestry  
425 in unrelated individuals. *Genome Res* 19(9), 1655-1664. doi: 10.1101/gr.094052.109.
- 426 Arnold, S.E., Vega, I.E., Karlawish, J.H., Wolk, D.A., Nunez, J., Negron, M., et al. (2013).  
427 Frequency and clinicopathological characteristics of presenilin 1 Gly206Ala mutation in  
428 Puerto Rican Hispanics with dementia. *J Alzheimers Dis* 33(4), 1089-1095. doi:  
429 10.3233/JAD-2012-121570.
- 430 Athan, E.S., Williamson, J., Ciappa, A., Santana, V., Romas, S.N., Lee, J.H., et al. (2001). A  
431 founder mutation in presenilin 1 causing early-onset Alzheimer disease in unrelated  
432 Caribbean Hispanic families. *JAMA* 286(18), 2257-2263.
- 433 Browning, B.L., and Browning, S.R. (2009). A unified approach to genotype imputation and  
434 haplotype-phase inference for large data sets of trios and unrelated individuals. *Am J*  
435 *Hum Genet* 84(2), 210-223. doi: 10.1016/j.ajhg.2009.01.005.
- 436 Danecek, P., Auton, A., Abecasis, G., Albers, C.A., Banks, E., DePristo, M.A., et al. (2011). The  
437 variant call format and VCFtools. *Bioinformatics* 27(15), 2156-2158. doi:  
438 10.1093/bioinformatics/btr330.
- 439 Das, S., Forer, L., Schonherr, S., Sidore, C., Locke, A.E., Kwong, A., et al. (2016). Next-  
440 generation genotype imputation service and methods. *Nat Genet* 48(10), 1284-1287. doi:  
441 10.1038/ng.3656.
- 442 Delaneau, O., Zagury, J.F., and Marchini, J. (2013). Improved whole-chromosome phasing for  
443 disease and population genetic studies. *Nat Methods* 10(1), 5-6. doi: 10.1038/nmeth.2307.
- 444 Genomes Project, C., Auton, A., Brooks, L.D., Durbin, R.M., Garrison, E.P., Kang, H.M., et al.  
445 (2015). A global reference for human genetic variation. *Nature* 526(7571), 68-74. doi:  
446 10.1038/nature15393.
- 447 Gibson, G. (2012). Rare and common variants: twenty arguments. *Nat Rev Genet* 13(2), 135-  
448 145. doi: 10.1038/nrg3118.
- 449 Ha, N.T., Freytag, S., and Bickeboeller, H. (2014). Coverage and efficiency in current SNP  
450 chips. *Eur J Hum Genet* 22(9), 1124-1130. doi: 10.1038/ejhg.2013.304.
- 451 Hancock, D.B., Levy, J.L., Gaddis, N.C., Bierut, L.J., Saccone, N.L., Page, G.P., et al. (2012).  
452 Assessment of genotype imputation performance using 1000 Genomes in African  
453 American studies. *PLoS One* 7(11), e50610. doi: 10.1371/journal.pone.0050610.
- 454 Herzig, A.F., Nutile, T., Babron, M.C., Ciullo, M., Bellenguez, C., and Leutenegger, A.L.  
455 (2018). Strategies for phasing and imputation in a population isolate. *Genet Epidemiol*  
456 42(2), 201-213. doi: 10.1002/gepi.22109.
- 457 Howie, B., Fuchsberger, C., Stephens, M., Marchini, J., and Abecasis, G.R. (2012). Fast and  
458 accurate genotype imputation in genome-wide association studies through pre-phasing.  
459 *Nat Genet* 44(8), 955-959. doi: 10.1038/ng.2354.
- 460 Howie, B.N., Donnelly, P., and Marchini, J. (2009). A flexible and accurate genotype imputation  
461 method for the next generation of genome-wide association studies. *PLoS Genet* 5(6),  
462 e1000529. doi: 10.1371/journal.pgen.1000529.
- 463 Huang, J., Howie, B., McCarthy, S., Memari, Y., Walter, K., Min, J.L., et al. (2015). Improved  
464 imputation of low-frequency and rare variants using the UK10K haplotype reference  
465 panel. *Nat Commun* 6, 8111. doi: 10.1038/ncomms9111.

- 466 Igartua, C., Myers, R.A., Mathias, R.A., Pino-Yanes, M., Eng, C., Graves, P.E., et al. (2015).  
467 Ethnic-specific associations of rare and low-frequency DNA sequence variants with  
468 asthma. *Nat Commun* 6, 5965. doi: 10.1038/ncomms6965.
- 469 Lee, J.H., Cheng, R., Vardarajan, B., Lantigua, R., Reyes-Dumeyer, D., Ortmann, W., et al.  
470 (2015). Genetic Modifiers of Age at Onset in Carriers of the G206A Mutation in PSEN1  
471 With Familial Alzheimer Disease Among Caribbean Hispanics. *JAMA Neurol* 72(9),  
472 1043-1051. doi: 10.1001/jamaneurol.2015.1424.
- 473 Li, J.Z., Absher, D.M., Tang, H., Southwick, A.M., Casto, A.M., Ramachandran, S., et al.  
474 (2008). Worldwide human relationships inferred from genome-wide patterns of variation.  
475 *Science* 319(5866), 1100-1104. doi: 10.1126/science.1153717.
- 476 Liu, E.Y., Li, M., Wang, W., and Li, Y. (2013). MaCH-admix: genotype imputation for admixed  
477 populations. *Genet Epidemiol* 37(1), 25-37. doi: 10.1002/gepi.21690.
- 478 Liu, Q., Cirulli, E.T., Han, Y., Yao, S., Liu, S., and Zhu, Q. (2015). Systematic assessment of  
479 imputation performance using the 1000 Genomes reference panels. *Brief Bioinform*  
480 16(4), 549-562. doi: 10.1093/bib/bbu035.
- 481 Loh, P.R., Danecek, P., Palamara, P.F., Fuchsberger, C., Y, A.R., H, K.F., et al. (2016).  
482 Reference-based phasing using the Haplotype Reference Consortium panel. *Nat Genet*  
483 48(11), 1443-1448. doi: 10.1038/ng.3679.
- 484 Marchini, J., and Howie, B. (2010). Genotype imputation for genome-wide association studies.  
485 *Nat Rev Genet* 11(7), 499-511. doi: 10.1038/nrg2796.
- 486 McHugh, M.L. (2012). Interrater reliability: the kappa statistic. *Biochem Med (Zagreb)* 22(3),  
487 276-282.
- 488 Nagy, R., Boutin, T.S., Marten, J., Huffman, J.E., Kerr, S.M., Campbell, A., et al. (2017).  
489 Exploration of haplotype research consortium imputation for genome-wide association  
490 studies in 20,032 Generation Scotland participants. *Genome Med* 9(1), 23. doi:  
491 10.1186/s13073-017-0414-4.
- 492 Nelson, S.C., Stilp, A.M., Papanicolaou, G.J., Taylor, K.D., Rotter, J.I., Thornton, T.A., et al.  
493 (2016). Improved imputation accuracy in Hispanic/Latino populations with larger and  
494 more diverse reference panels: applications in the Hispanic Community Health  
495 Study/Study of Latinos (HCHS/SOL). *Hum Mol Genet* 25(15), 3245-3254. doi:  
496 10.1093/hmg/ddw174.
- 497 Pei, Y.F., Zhang, L., Li, J., and Deng, H.W. (2010). Analyses and comparison of imputation-  
498 based association methods. *PLoS One* 5(5), e10827. doi: 10.1371/journal.pone.0010827.
- 499 Purcell, S., Neale, B., Todd-Brown, K., Thomas, L., Ferreira, M.A., Bender, D., et al. (2007).  
500 PLINK: a tool set for whole-genome association and population-based linkage analyses.  
501 *Am J Hum Genet* 81(3), 559-575. doi: 10.1086/519795.
- 502 Raghavan, N.S., Brickman, A.M., Andrews, H., Manly, J.J., Schupf, N., Lantigua, R., et al.  
503 (2018). Whole-exome sequencing in 20,197 persons for rare variants in Alzheimer's  
504 disease. *Ann Clin Transl Neurol* 5(7), 832-842. doi: 10.1002/acn3.582.
- 505 Roshvara, N.R., Kirsten, H., Horn, K., Ahnert, P., and Scholz, M. (2014). Impact of pre-  
506 imputation SNP-filtering on genotype imputation results. *BMC Genet* 15, 88. doi:  
507 10.1186/s12863-014-0088-5.
- 508 Surakka, I., Sarin, A.-P., Ruotsalainen, S.E., Durbin, R., Salomaa, V., Daly, M., et al. (2016).  
509 The rate of false polymorphisms introduced when imputing genotypes from global  
510 imputation panels. *bioRxiv*. doi: 10.1101/080770.

- 511 Tosto, G., Fu, H., Vardarajan, B.N., Lee, J.H., Cheng, R., Reyes-Dumeyer, D., et al. (2015). F-  
512 box/LRR-repeat protein 7 is genetically associated with Alzheimer's disease. *Ann Clin*  
513 *Transl Neurol* 2(8), 810-820. doi: 10.1002/acn3.223.
- 514 Verma, S.S., de Andrade, M., Tromp, G., Kuivaniemi, H., Pugh, E., Namjou-Khales, B., et al.  
515 (2014). Imputation and quality control steps for combining multiple genome-wide  
516 datasets. *Front Genet* 5, 370. doi: 10.3389/fgene.2014.00370.
- 517 Zhang, B., Zhi, D., Zhang, K., Gao, G., Limdi, N.N., and Liu, N. (2011). Practical Consideration  
518 of Genotype Imputation: Sample Size, Window Size, Reference Choice, and Untyped  
519 Rate. *Stat Interface* 4(3), 339-352.
- 520 Zheng, H.F., Ladouceur, M., Greenwood, C.M., and Richards, J.B. (2012). Effect of genome-  
521 wide genotyping and reference panels on rare variants imputation. *J Genet Genomics*  
522 39(10), 545-550. doi: 10.1016/j.jgg.2012.07.002.
- 523 Zheng, H.F., Rong, J.J., Liu, M., Han, F., Zhang, X.W., Richards, J.B., et al. (2015).  
524 Performance of genotype imputation for low frequency and rare variants from the 1000  
525 genomes. *PLoS One* 10(1), e0116487. doi: 10.1371/journal.pone.0116487.
- 526 Zhou, H., Alexander, D., and Lange, K. (2011). A quasi-Newton acceleration for high-  
527 dimensional optimization algorithms. *Stat Comput* 21(2), 261-273. doi: 10.1007/s11222-  
528 009-9166-3.
- 529



530

531 **Table 1:** SNP counts in HRC and 1000G reference panel.

| <b>Reference Panel</b> | <b>Individuals</b> | <b>Autosomal variants</b> | <b>Bi-allelic SNPs</b> | <b>Multi-allelic SNPs</b> |
|------------------------|--------------------|---------------------------|------------------------|---------------------------|
| <b>1000G Phase 3</b>   | 2,504              | 81,706,022                | 77,818,332             | 3,887,690                 |
| <b>HRC</b>             | 27,165*            | 39,131,600                | 39,131,600             | NA                        |

532 \*For Chromosome 1, the number of individuals were 22,691

533

534 **Table 2:** Type of imputed SNPs across reference panels.

| Reference Panel                         | Multi-allelic SNPs |                       |                      | Bi-allelic SNPs |                       |                       | Total SNPs |                       |                       |
|-----------------------------------------|--------------------|-----------------------|----------------------|-----------------|-----------------------|-----------------------|------------|-----------------------|-----------------------|
|                                         | Total SNPs         | Info* $\geq 0.40$ (%) | Info $\geq 0.80$ (%) | Total SNPs      | Info $\geq 0.40$ (%)  | Info $\geq 0.80$ (%)  | Total SNPs | Info $\geq 0.40$ (%)  | Info $\geq 0.80$ (%)  |
| <b>All SNPs</b>                         |                    |                       |                      |                 |                       |                       |            |                       |                       |
| <b>1000G</b>                            | 3,319,815          | 2,586,342<br>(77.90)  | 2,061,295<br>(62.09) | 77,920,577      | 31,423,926<br>(40.32) | 23,468,086<br>(30.11) | 81,240,392 | 31,423,926<br>(41.86) | 25,529,381<br>(31.42) |
| <b>HRC</b>                              | NA                 | NA                    | NA                   | 38,532,090      | 23,436,980<br>(60.82) | 18,833,790<br>(48.87) | 38,532,090 | 23,436,980<br>(60.82) | 18,833,790<br>(48.79) |
| <b>SNPs overlapping HRC &amp; 1000G</b> |                    |                       |                      |                 |                       |                       |            |                       |                       |
| <b>1000G</b>                            | NA                 | NA                    | NA                   | 30,090,251      | 22,631,112<br>(75.21) | 18,408,585<br>(61.17) | 30,090,251 | 22,631,112<br>(75.21) | 18,408,585<br>(61.17) |
| <b>HRC</b>                              | NA                 | NA                    | NA                   | 30,090,251      | 22,438,268<br>(74.56) | 18,395,036<br>(61.13) | 30,090,251 | 22,438,268<br>(74.56) | 18,395,036<br>(61.13) |

535

536

537

538

539 **Table 3:** SNP Counts for all Bi-allelic uncommon, rare and ultra-rare SNPs.

540

| MAF                                     | 1000G         |                       |                       | HRC           |                       |                      |
|-----------------------------------------|---------------|-----------------------|-----------------------|---------------|-----------------------|----------------------|
|                                         | Info $\geq 0$ | Info $\geq 0.40$ (%)  | Info $\geq 0.80$ (%)  | Info $\geq 0$ | Info $\geq 0.40$ (%)  | Info $\geq 0.80$ (%) |
| <b>All SNPs</b>                         |               |                       |                       |               |                       |                      |
| [1% - 5%]                               | 6,025,281     | 5,989,223<br>(98.90)  | 5,441,982<br>(90.31)  | 5,434,996     | 5,421,257<br>(99.84)  | 5,061,904 (93.13)    |
| [0.1% - 1%)                             | 20,249,058    | 16,881,286<br>(83.36) | 10,901,789<br>(53.83) | 11,780,671    | 10,931,924<br>(92.79) | 7,404,808<br>(62.85) |
| [0 - 0.1%)                              | 44,562,205    | 1,490,434<br>(3.34)   | 242,717<br>(0.544)    | 15,055,433    | 828,256<br>(5.50)     | 174,673<br>(1.16)    |
| <b>SNPs overlapping HRC &amp; 1000G</b> |               |                       |                       |               |                       |                      |
| [1% - 5%]                               | 5,624,956     | 5,604,308<br>(99.63)  | 5,148,285<br>(91.52)  | 5,396,207     | 5,385,364<br>(99.79)  | 5,037,187<br>(93.34) |
| [0.1% - 1%)                             | 11,875,603    | 10,442,603<br>(87.93) | 7,027,312<br>(59.17)  | 10,945,899    | 10,268,136<br>(93.80) | 7,060,908<br>(64.50) |
| [0 - 0.1%)                              | 6,314,479     | 312,967<br>(4.95)     | 47,614<br>(0.75)      | 7,519,807     | 560,043<br>(7.44)     | 127,423<br>(1.69)    |

541

542 **Table 4:** Comparison for mismatch counts and Kappa (*K*) for HRC and 1000G using WES data  
 543 on Chromosome 14.

| MAF         | 1000G            |                            |                  |                    | HRC              |                            |                  |                    |
|-------------|------------------|----------------------------|------------------|--------------------|------------------|----------------------------|------------------|--------------------|
|             | Info $\geq 0.80$ |                            |                  |                    | Info $\geq 0.80$ |                            |                  |                    |
|             | SNP              | Total SNPs in all persons* | Mismatch         | Kappa ( <i>K</i> ) | SNP              | Total SNPs in all persons* | Mismatch         | Kappa ( <i>K</i> ) |
| [1% - 5%]   | 2,354            | 610,550                    | 7,397<br>(1.22%) | 0.99               | 2,264            | 587,961                    | 8,963<br>(1.52%) | 0.99               |
| [0.1% - 1%] | 3,542            | 926,109                    | 1,245<br>(0.13%) | 0.99               | 3,759            | 982,734                    | 2,439<br>(0.24%) | 0.99               |
| [0 - 0.1%]  | 35               | 9,163                      | 10<br>(0.10%)    | 0.99               | 93               | 24,348                     | 32<br>(0.13%)    | 0.99               |

544 \*Less value than 262\*SNP because imputed with poor posterior probability failed to be  
 545 converted from .gen to plink format.

546 **Figure 1:** Comparison of average Info quality between HRC and 1000G reference panel for all autosomal  
547 chromosomes

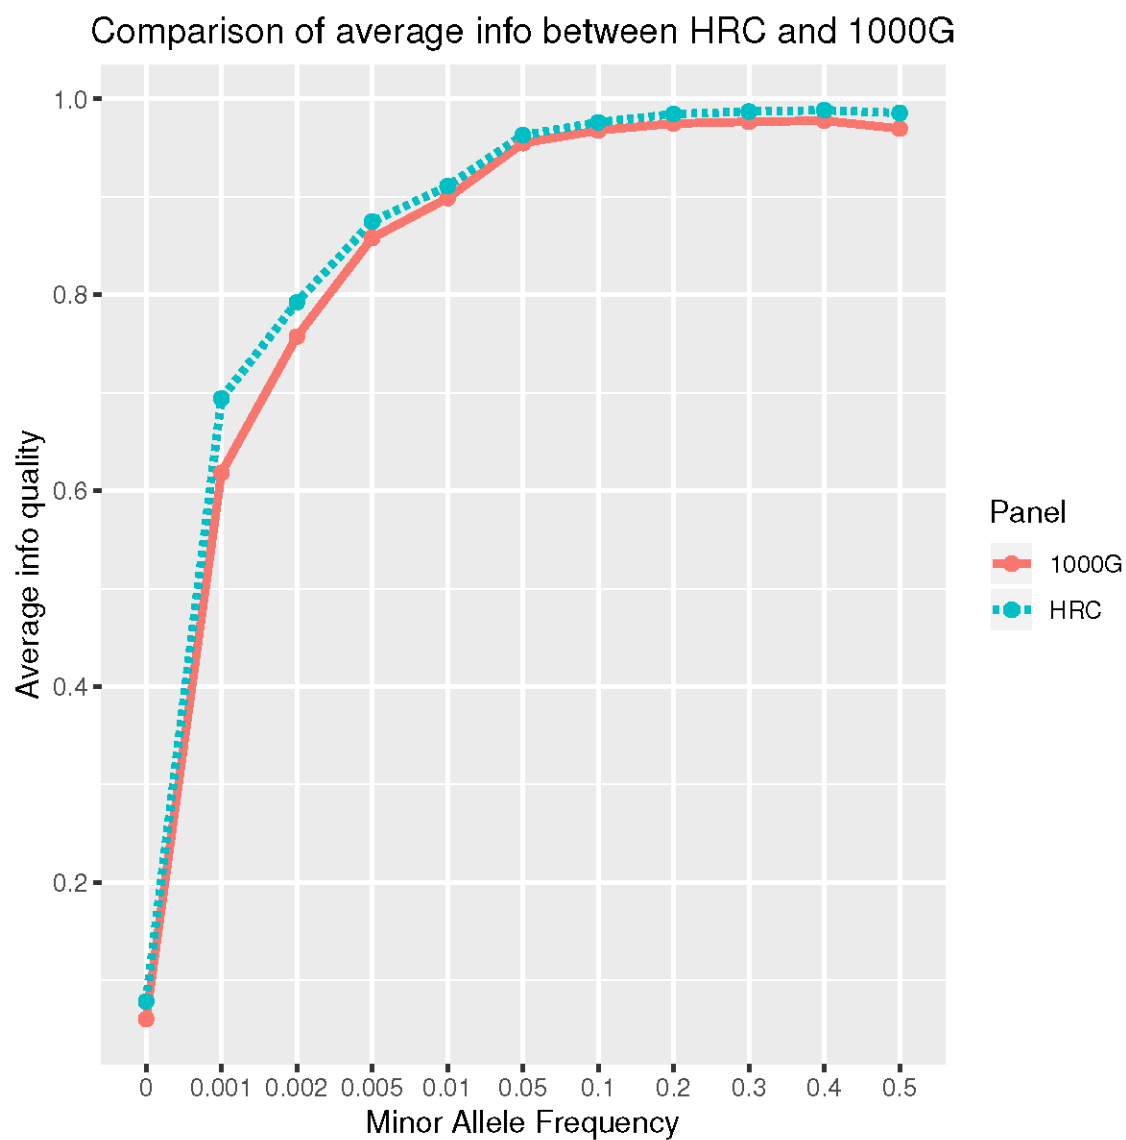

548

549 **Figure 2:** Comparison of average Info on CHR14: 70-75MB (5MB) vs 73-74MB (1MB) region

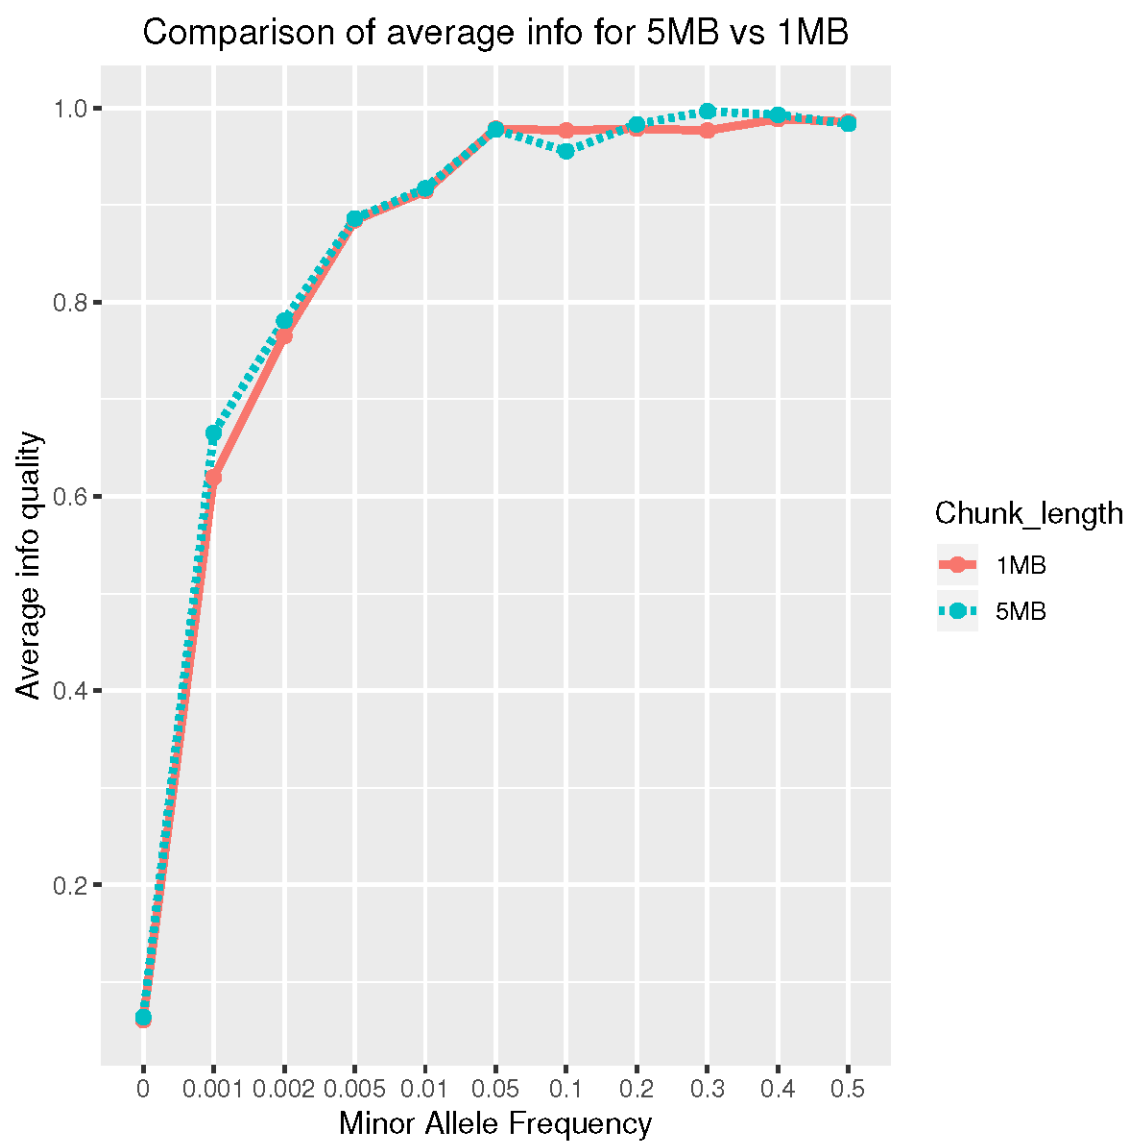

550

Comparison of average info between HRC and 1000G

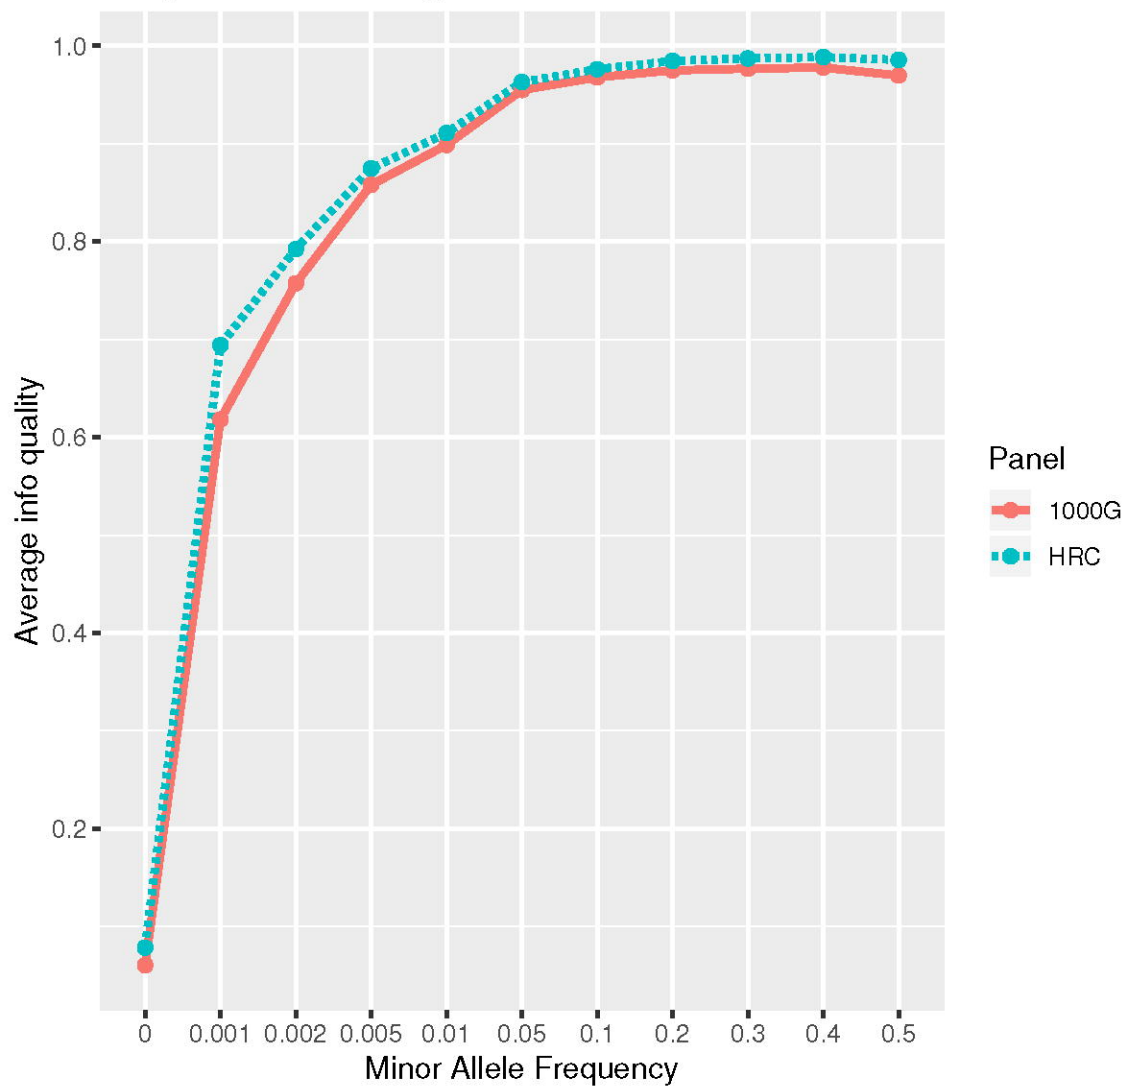

Comparison of average info for 5MB vs 1MB

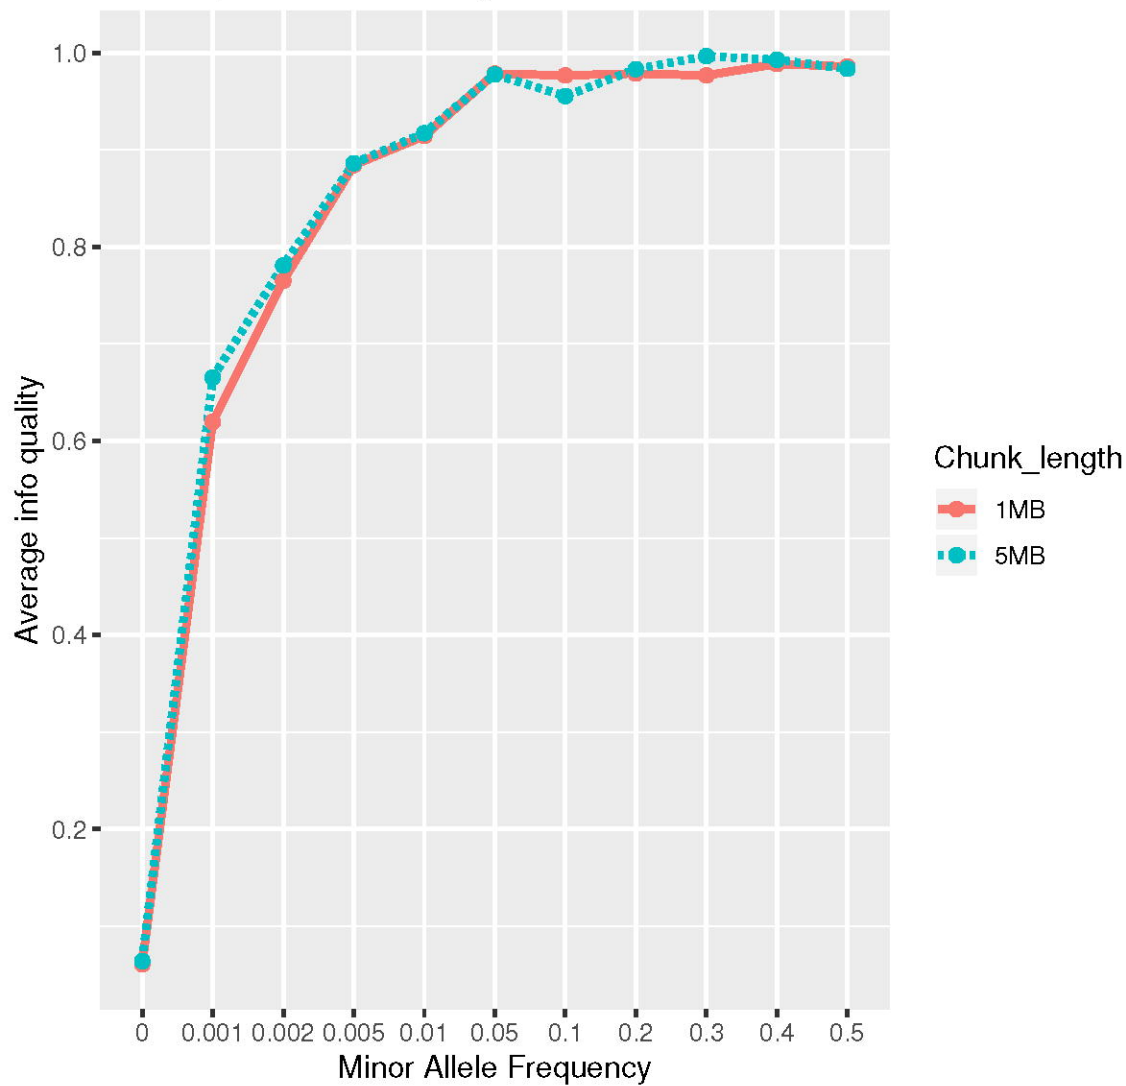

Source: https://www.biorxiv.org/content/10.1101/494229v2.full.pdf
